# Supplementary material for: Irrigation mitigates wheat yield loss by pests and diseases under global change across China
Source: Research Square preprint supplement (doi:10.21203/rs.3.rs-6763710/v1), 2025-07-01
Supplement: Supplementary file 1 [file 256a7e8eaf3677b878ee67f4.docx]

**Supplementary information**

Table S1 an expert-based assessment of criterion degree of yield loss

|  | **1** | **2** | **3** | **4** | **5** |
| --- | --- | --- | --- | --- | --- |
| **Grain** | **5%** | **10%** | **15%** | **20%** | **25%** |
| **cotton** | **10%** | **20%** | **30%** | **40%** | **50%** |
| **Oil crop** | **6%** | **12%** | **18%** | **24%** | **30%** |

Table S2 All direct and indirect effects of climate change, crop simplification, agricultural activities and economic development on percentage of occurrence area of aphids.

| **Regressions** | **Estimate** | **Std.Err** | **z-value** | **P(>|z|)** | **Std.lv** | **Std.all** |
| --- | --- | --- | --- | --- | --- | --- |
| **Average temperature ~** |  |  |  |  |  |  |
| **GDP** | **0.317** | **0.332** | **0.955** | **0.34** | **0.317** | **0.605** |
| **Total industrial exhaust emissions** | **-0.158** | **0.337** | **-0.469** | **0.639** | **-0.158** | **-0.242** |
| **Precipitation ~** |  |  |  |  |  |  |
| **GDP** | **-0.198** | **0.461** | **-0.43** | **0.667** | **-0.198** | **-2.929** |
| **Total industrial exhaust emissions** | **0.108** | **0.383** | **0.283** | **0.777** | **0.108** | **1.285** |
| **Crop simplification** | **0.33** | **0.418** | **0.791** | **0.429** | **0.33** | **4.595** |
| **Fertilizer** | **-0.089** | **0.175** | **-0.507** | **0.612** | **-0.089** | **-1.426** |
| **Wind speed ~** |  |  |  |  |  |  |
| **GDP** | **0.138** | **0.145** | **0.953** | **0.34** | **0.138** | **0.177** |
| **Total industrial exhaust emissions** | **-0.088** | **0.161** | **-0.544** | **0.586** | **-0.088** | **-0.09** |
| **Control area of aphids ~** |  |  |  |  |  |  |
| **GDP** | **-1.77** | **1.971** | **-0.898** | **0.369** | **-1.77** | **-0.609** |
| **Total industrial exhaust emissions** | **3.142** | **2.25** | **1.396** | **0.163** | **3.142** | **0.869** |
| **Aging population** | **-8.518** | **4.106** | **-2.075** | **0.038** | **-8.518** | **-0.563** |
| **Crop simplification** | **0.774** | **0.549** | **1.41** | **0.159** | **0.774** | **0.251** |
| **Crop simplification ~** |  |  |  |  |  |  |
| **GDP** | **0.713** | **0.837** | **0.852** | **0.394** | **0.713** | **0.757** |
| **Total industrial exhaust emissions** | **-0.562** | **0.822** | **-0.683** | **0.494** | **-0.562** | **-0.479** |
| **Fertilizer** | **0.341** | **0.14** | **2.442** | **0.015** | **0.341** | **0.394** |
| **Aging population** | **1.466** | **1.691** | **0.867** | **0.386** | **1.466** | **0.299** |
| **Fertilizer ~** |  |  |  |  |  |  |
| **Average temperature** | **0.237** | **0.059** | **4.029** | **0** | **0.237** | **0.114** |
| **Precipitation** | **2.567** | **0.57** | **4.5** | **0** | **2.567** | **0.16** |
| **Irrigation** | **0.933** | **0.083** | **11.266** | **0** | **0.933** | **0.836** |
| **Aging population** | **0.009** | **0.369** | **0.024** | **0.981** | **0.009** | **0.002** |
| **GDP** | **-0.11** | **0.304** | **-0.362** | **0.718** | **-0.11** | **-0.101** |
| **Total industrial exhaust emissions** | **0.205** | **0.235** | **0.874** | **0.382** | **0.205** | **0.151** |
| **Irrigation ~** |  |  |  |  |  |  |
| **Fertilizer** | **0.866** | **0.14** | **6.189** | **0** | **0.866** | **0.967** |
| **Total industrial exhaust emissions** | **1.179** | **0.656** | **1.798** | **0.072** | **1.179** | **0.971** |
| **GDP** | **-1.075** | **0.577** | **-1.865** | **0.062** | **-1.075** | **-1.103** |
| **Aging population** | **2.971** | **5.165** | **0.575** | **0.565** | **2.971** | **0.585** |
| **Crop simplification** | **-0.637** | **1.007** | **-0.633** | **0.527** | **-0.637** | **-0.615** |
| **Aging population ~** |  |  |  |  |  |  |
| **Average temperature** | **0.722** | **0.729** | **0.989** | **0.322** | **0.722** | **1.97** |
| **Precipitation** | **-9.053** | **11.294** | **-0.802** | **0.423** | **-9.053** | **-3.19** |
| **GDP** | **0.168** | **0.138** | **1.216** | **0.224** | **0.168** | **0.875** |
| **Irrigation** | **-0.063** | **0.079** | **-0.804** | **0.421** | **-0.063** | **-0.321** |
| **GDP ~** |  |  |  |  |  |  |
| **Aging population** | **2.249** | **1.762** | **1.276** | **0.202** | **2.249** | **0.432** |
| **Irrigation** | **1.25** | **1.202** | **1.04** | **0.298** | **1.25** | **1.219** |
| **Fertilizer** | **-0.05** | **1.139** | **-0.044** | **0.965** | **-0.05** | **-0.054** |
| **Percentage of occurrence area of aphids ~** |  |  |  |  |  |  |
| **GDP** | **-0.252** | **0.095** | **-2.638** | **0.008** | **-0.252** | **-0.15** |
| **Total industrial exhaust emissions** | **0.568** | **0.107** | **5.303** | **0** | **0.568** | **0.273** |
| **Average temperature** | **-0.075** | **0.129** | **-0.582** | **0.561** | **-0.075** | **-0.023** |
| **Precipitation** | **-3.513** | **1.106** | **-3.176** | **0.001** | **-3.513** | **-0.142** |
| **Wind speed** | **-0.029** | **0.058** | **-0.501** | **0.616** | **-0.029** | **-0.014** |
| **Control area of aphids** | **0.446** | **0.018** | **24.176** | **0** | **0.446** | **0.774** |
| **Crop simplification** | **0.061** | **0.078** | **0.778** | **0.436** | **0.061** | **0.034** |
| **Aging population** | **2.015** | **0.337** | **5.976** | **0** | **2.015** | **0.231** |
| **Irrigation** | **-0.255** | **0.161** | **-1.586** | **0.113** | **-0.255** | **-0.148** |
| **Fertilizer** | **-0.408** | **0.16** | **-2.559** | **0.011** | **-0.408** | **-0.265** |

Table S3 All direct and indirect effects of climate change, crop simplification, agricultural activities and economic development on percentage of occurrence area of wheat mites.

| **Regressions** | **Estimate** | **Std.Err** | **z-value** | **P(>|z|)** | **Std.lv** | **Std.all** |
| --- | --- | --- | --- | --- | --- | --- |
| **Average temperature ~** | | |  |  |  |  |
| **GDP** | **0.044** | **0.491** | **0.089** | **0.929** | **0.044** | **0.084** |
| **Total industrial exhaust emissions** | **0.117** | **0.496** | **0.236** | **0.814** | **0.117** | **0.179** |
| **Precipitation ~** | |  |  |  |  |  |
| **GDP** | **1.009** | **6.461** | **0.156** | **0.876** | **1.009** | **14.886** |
| **Total industrial exhaust emissions** | **-2.902** | **14.13** | **-0.205** | **0.837** | **-2.902** | **-34.378** |
| **Crop simplification** | **-0.253** | **5.798** | **-0.044** | **0.965** | **-0.253** | **-3.514** |
| **Fertilizer** | **0.92** | **5.041** | **0.182** | **0.855** | **0.92** | **14.801** |
| **Percentage of occurrence area of wheat mites** | **2.068** | **9.771** | **0.212** | **0.832** | **2.068** | **50.06** |
| **Wind speed ~** | |  |  |  |  |  |
| **GDP** | **0.269** | **0.273** | **0.984** | **0.325** | **0.269** | **0.344** |
| **Total industrial exhaust emissions** | **-0.219** | **0.283** | **-0.773** | **0.44** | **-0.219** | **-0.225** |
| **Control area of wheat mites ~** | | |  |  |  |  |
| **GDP** | **-0.947** | **0.787** | **-1.203** | **0.229** | **-0.947** | **-0.316** |
| **Total industrial exhaust emissions** | **1.969** | **0.602** | **3.27** | **0.001** | **1.969** | **0.528** |
| **Aging population** | **-0.231** | **5.205** | **-0.044** | **0.965** | **-0.231** | **-0.015** |
| **Crop simplification** | **0.811** | **0.407** | **1.991** | **0.047** | **0.811** | **0.255** |
| **Crop simplification ~** | | |  |  |  |  |
| **GDP** | **0.351** | **0.504** | **0.696** | **0.487** | **0.351** | **0.372** |
| **Total industrial exhaust emissions** | **-0.188** | **0.486** | **-0.387** | **0.699** | **-0.188** | **-0.16** |
| **Fertilizer** | **0.321** | **0.093** | **3.469** | **0.001** | **0.321** | **0.371** |
| **Aging population** | **1.56** | **0.384** | **4.067** | **0** | **1.56** | **0.318** |
| **Fertilizer ~** | |  |  |  |  |  |
| **Average temperature** | **0.664** | **0.504** | **1.316** | **0.188** | **0.664** | **0.319** |
| **Precipitation** | **1.139** | **1.756** | **0.649** | **0.517** | **1.139** | **0.071** |
| **Irrigation** | **1.084** | **0.156** | **6.931** | **0** | **1.084** | **0.971** |
| **Aging population** | **-0.872** | **0.831** | **-1.049** | **0.294** | **-0.872** | **-0.154** |
| **GDP** | **-0.471** | **0.555** | **-0.848** | **0.396** | **-0.471** | **-0.432** |
| **Total industrial exhaust emissions** | **0.489** | **0.436** | **1.121** | **0.262** | **0.489** | **0.36** |
| **Irrigation ~** | |  |  |  |  |  |
| **Fertilizer** | **0.938** | **0.14** | **6.675** | **0** | **0.938** | **1.046** |
| **Total industrial exhaust emissions** | **0.696** | **0.484** | **1.438** | **0.15** | **0.696** | **0.571** |
| **GDP** | **-0.725** | **0.456** | **-1.591** | **0.112** | **-0.725** | **-0.741** |
| **Aging population** | **1.421** | **0.609** | **2.334** | **0.02** | **1.421** | **0.279** |
| **Crop simplification** | **-0.289** | **0.236** | **-1.224** | **0.221** | **-0.289** | **-0.278** |
| **Aging populationng** | |  |  |  |  |  |
| **Average temperature** | **-11.533** | **325.132** | **-0.035** | **0.972** | **-11.533** | **-31.445** |
| **Precipitation** | **174.146** | **4882.809** | **0.036** | **0.972** | **174.146** | **61.442** |
| **GDP** | **-5.849** | **167.822** | **-0.035** | **0.972** | **-5.849** | **-30.433** |
| **Irrigation** | **6.609** | **187.965** | **0.035** | **0.972** | **6.609** | **33.635** |
| **GDP ~** |  |  |  |  |  |  |
| **Aging population** | **9.362** | **8.338** | **1.123** | **0.262** | **9.362** | **1.799** |
| **Irrigation** | **2.412** | **2.313** | **1.043** | **0.297** | **2.412** | **2.359** |
| **Fertilizer** | **-1.7** | **2.687** | **-0.632** | **0.527** | **-1.7** | **-1.854** |
| **Percentage of occurrence area of wheat mites ~** | | | | |  |  |
| **GDP** | **-0.242** | **0.224** | **-1.08** | **0.28** | **-0.242** | **-0.147** |
| **Total industrial exhaust emissions** | **-0.185** | **0.226** | **-0.819** | **0.413** | **-0.185** | **-0.091** |
| **Average temperature** | **0.476** | **0.196** | **2.427** | **0.015** | **0.476** | **0.152** |
| **Precipitation** | **-14.331** | **4.656** | **-3.078** | **0.002** | **-14.331** | **-0.592** |
| **Wind speed** | **-0.037** | **0.069** | **-0.539** | **0.59** | **-0.037** | **-0.018** |
| **Control area of wheat mites** | **0.404** | **0.061** | **6.651** | **0** | **0.404** | **0.737** |
| **Crop simplification** | **0.204** | **0.141** | **1.454** | **0.146** | **0.204** | **0.117** |
| **Aging population** | **0.989** | **1.624** | **0.609** | **0.543** | **0.989** | **0.116** |
| **Irrigation** | **-0.876** | **0.408** | **-2.148** | **0.032** | **-0.876** | **-0.522** |
| **Fertilizer** | **1.284** | **0.611** | **2.103** | **0.035** | **1.284** | **0.854** |

Table S4 All direct and indirect effects of climate change, crop simplification, agricultural activities and economic development on percentage of occurrence area of wheat midge.

| **Regressions:** | **Estimate** | **Std.Err** | **z-value** | **P(>|z|)** | **Std.lv** | **Std.all** |
| --- | --- | --- | --- | --- | --- | --- |
| **Average temperature ~** | | |  |  |  |  |
| **GDP** | **0.105** | **0.544** | **0.193** | **0.847** | **0.105** | **0.2** |
| **Total industrial exhaust emissions** | **0.055** | **0.549** | **0.1** | **0.92** | **0.055** | **0.084** |
| **Precipitation ~** | |  |  |  |  |  |
| **GDP** | **-0.086** | **0.101** | **-0.853** | **0.394** | **-0.086** | **-1.273** |
| **Total industrial exhaust emissions** | **0.013** | **0.09** | **0.146** | **0.884** | **0.013** | **0.155** |
| **Crop simplification** | **0.273** | **0.123** | **2.224** | **0.026** | **0.273** | **3.795** |
| **Fertilizer** | **-0.071** | **0.046** | **-1.551** | **0.121** | **-0.071** | **-1.147** |
| **Wind speed~** | |  |  |  |  |  |
| **GDP** | **0.223** | **0.268** | **0.833** | **0.405** | **0.223** | **0.285** |
| **Total industrial exhaust emissions** | **-0.173** | **0.278** | **-0.623** | **0.533** | **-0.173** | **-0.178** |
| **Control area of wheat midge ~** | | | |  |  |  |
| **GDP** | **-0.097** | **3.063** | **-0.032** | **0.975** | **-0.097** | **-0.041** |
| **Total industrial exhaust emissions** | **1.018** | **2.571** | **0.396** | **0.692** | **1.018** | **0.346** |
| **Aging population** | **-12.698** | **6.394** | **-1.986** | **0.047** | **-12.698** | **-1.031** |
| **Crop simplification** | **1.38** | **0.432** | **3.191** | **0.001** | **1.38** | **0.549** |
| **Crop simplification ~** | | |  |  |  |  |
| **GDP** | **0.318** | **0.872** | **0.364** | **0.716** | **0.318** | **0.337** |
| **Total industrial exhaust emissions** | **-0.171** | **0.821** | **-0.209** | **0.835** | **-0.171** | **-0.146** |
| **Fertilizer** | **0.284** | **0.085** | **3.355** | **0.001** | **0.284** | **0.328** |
| **Aging population** | **2.157** | **1.472** | **1.465** | **0.143** | **2.157** | **0.44** |
| **Fertilizer ~** | |  |  |  |  |  |
| **Average temperature** | **0.269** | **0.199** | **1.355** | **0.176** | **0.269** | **0.13** |
| **Precipitation** | **3.262** | **2.449** | **1.332** | **0.183** | **3.262** | **0.203** |
| **Irrigation** | **0.918** | **0.051** | **17.966** | **0** | **0.918** | **0.823** |
| **Aging population** | **-0.047** | **0.299** | **-0.156** | **0.876** | **-0.047** | **-0.008** |
| **GDP** | **-0.285** | **0.593** | **-0.481** | **0.631** | **-0.285** | **-0.262** |
| **Total industrial exhaust emissions** | **0.378** | **0.525** | **0.721** | **0.471** | **0.378** | **0.279** |
| **Irrigation ~** | |  |  |  |  |  |
| **Fertilizer** | **0.843** | **0.076** | **11.126** | **0** | **0.843** | **0.941** |
| **Total industrial exhaust emissions** | **0.757** | **1.035** | **0.731** | **0.464** | **0.757** | **0.623** |
| **GDP** | **-0.692** | **1.021** | **-0.677** | **0.498** | **-0.692** | **-0.709** |
| **Aging population** | **0.982** | **3.767** | **0.261** | **0.794** | **0.982** | **0.193** |
| **Crop simplification** | **-0.256** | **0.518** | **-0.494** | **0.621** | **-0.256** | **-0.247** |
| **Aging population ~** | |  |  |  |  |  |
| **Average temperature** | **0.96** | **0.612** | **1.568** | **0.117** | **0.96** | **2.625** |
| **Precipitation** | **-10.83** | **7.285** | **-1.487** | **0.137** | **-10.83** | **-3.818** |
| **GDP** | **0.126** | **0.103** | **1.228** | **0.219** | **0.126** | **0.656** |
| **Irrigation** | **-0.012** | **0.07** | **-0.17** | **0.865** | **-0.012** | **-0.061** |
| **GDP ~** |  |  |  |  |  |  |
| **Aging population** | **2.642** | **1.854** | **1.425** | **0.154** | **2.642** | **0.508** |
| **Irrigation** | **0.822** | **1.521** | **0.54** | **0.589** | **0.822** | **0.802** |
| **Fertilizer** | **0.271** | **1.436** | **0.189** | **0.85** | **0.271** | **0.295** |
| **Percentage of occurrence area of wheat midge ~** | | | | |  |  |
| **GDP** | **0.363** | **0.074** | **4.913** | **0** | **0.363** | **0.264** |
| **Total industrial exhaust emissions** | **-0.351** | **0.083** | **-4.238** | **0** | **-0.351** | **-0.205** |
| **Average temperature** | **0.182** | **0.103** | **1.778** | **0.075** | **0.182** | **0.07** |
| **Precipitation** | **-4.245** | **0.868** | **-4.891** | **0** | **-4.245** | **-0.209** |
| **Wind speed** | **0.023** | **0.047** | **0.49** | **0.624** | **0.023** | **0.013** |
| **Control area of wheat midge** | **0.514** | **0.018** | **28.658** | **0** | **0.514** | **0.883** |
| **Crop simplification** | **0.108** | **0.068** | **1.596** | **0.11** | **0.108** | **0.074** |
| **Aging population** | **-0.1** | **0.273** | **-0.366** | **0.714** | **-0.1** | **-0.014** |
| **Irrigation** | **-0.235** | **0.128** | **-1.838** | **0.066** | **-0.235** | **-0.167** |
| **Fertilizer** | **-0.292** | **0.127** | **-2.295** | **0.022** | **-0.292** | **-0.23** |

Table S5 All direct and indirect effects of climate change, crop simplification, agricultural activities and economic development on percentage of occurrence area of underground pests.

| **Regressions** | **Estimate** | **Std.Err** | **z-value** | **P(>|z|)** | **Std.lv** | **Std.all** |
| --- | --- | --- | --- | --- | --- | --- |
| **Average temperature ~** |  |  |  |  |  |  |
| **GDP** | **-0.078** | **0.29** | **-0.268** | **0.789** | **-0.078** | **-0.148** |
| **Total industrial exhaust emissions** | **0.239** | **0.295** | **0.81** | **0.418** | **0.239** | **0.365** |
| **Precipitation ~** |  |  |  |  |  |  |
| **GDP** | **-0.141** | **0.192** | **-0.732** | **0.464** | **-0.141** | **-2.076** |
| **Total industrial exhaust emissions** | **0.009** | **0.126** | **0.074** | **0.941** | **0.009** | **0.111** |
| **Crop simplification** | **0.391** | **0.259** | **1.509** | **0.131** | **0.391** | **5.433** |
| **Fertilizer** | **-0.08** | **0.076** | **-1.047** | **0.295** | **-0.08** | **-1.278** |
| **Wind speed ~** |  |  |  |  |  |  |
| **GDP** | **0.313** | **0.182** | **1.718** | **0.086** | **0.313** | **0.4** |
| **Total industrial exhaust emissions** | **-0.263** | **0.196** | **-1.343** | **0.179** | **-0.263** | **-0.27** |
| **Control area of undergroundpests ~** | | |  |  |  |  |
| **GDP** | **2.752** | **5.568** | **0.494** | **0.621** | **2.752** | **1.042** |
| **Total industrial exhaust emissions** | **0.013** | **3.804** | **0.004** | **0.997** | **0.013** | **0.004** |
| **Aging population** | **-21.738** | **14.352** | **-1.515** | **0.13** | **-21.738** | **-1.582** |
| **Crop simplification** | **-0.183** | **1.967** | **-0.093** | **0.926** | **-0.183** | **-0.065** |
| **Crop simplification ~** |  |  |  |  |  |  |
| **GDP** | **-0.032** | **0.444** | **-0.071** | **0.943** | **-0.032** | **-0.034** |
| **Total industrial exhaust emissions** | **0.073** | **0.323** | **0.226** | **0.821** | **0.073** | **0.062** |
| **Fertilizer** | **0.335** | **0.098** | **3.406** | **0.001** | **0.335** | **0.387** |
| **Aging population** | **2.983** | **1.212** | **2.46** | **0.014** | **2.983** | **0.608** |
| **Fertilizer ~** |  |  |  |  |  |  |
| **Average temperature** | **0.368** | **0.163** | **2.266** | **0.023** | **0.368** | **0.178** |
| **Precipitation** | **4.289** | **1.438** | **2.983** | **0.003** | **4.289** | **0.267** |
| **Irrigation** | **0.937** | **0.065** | **14.421** | **0** | **0.937** | **0.84** |
| **Aging population** | **-0.278** | **0.899** | **-0.309** | **0.757** | **-0.278** | **-0.049** |
| **GDP** | **-0.474** | **0.154** | **-3.085** | **0.002** | **-0.474** | **-0.436** |
| **Total industrial exhaust emissions** | **0.539** | **0.146** | **3.681** | **0** | **0.539** | **0.398** |
| **Irrigation ~** |  |  |  |  |  |  |
| **Fertilizer** | **0.787** | **0.099** | **7.987** | **0** | **0.787** | **0.879** |
| **Total industrial exhaust emissions** | **0.489** | **0.223** | **2.196** | **0.028** | **0.489** | **0.403** |
| **GDP** | **-0.358** | **0.307** | **-1.165** | **0.244** | **-0.358** | **-0.367** |
| **Aging population** | **0.002** | **0.851** | **0.002** | **0.998** | **0.002** | **0** |
| **Crop simplification** | **-0.155** | **0.07** | **-2.211** | **0.027** | **-0.155** | **-0.15** |
| **Aging populationng** |  |  |  |  |  |  |
| **Average temperature** | **2.076** | **1.826** | **1.137** | **0.256** | **2.076** | **5.678** |
| **Precipitation** | **-23.069** | **20.831** | **-1.107** | **0.268** | **-23.069** | **-8.135** |
| **GDP** | **0.19** | **0.174** | **1.092** | **0.275** | **0.19** | **0.987** |
| **Irrigation** | **-0.045** | **0.116** | **-0.39** | **0.696** | **-0.045** | **-0.231** |
| **GDP ~** |  |  |  |  |  |  |
| **Aging population** | **0.806** | **1.72** | **0.469** | **0.639** | **0.806** | **0.155** |
| **Irrigation** | **-0.04** | **1.021** | **-0.039** | **0.969** | **-0.04** | **-0.039** |
| **Fertilizer** | **1.168** | **0.978** | **1.194** | **0.232** | **1.168** | **1.271** |
| **Percentage of occurrence area of underground pests ~** | | | |  |  |  |
| **GDP** | **0.059** | **0.105** | **0.563** | **0.573** | **0.059** | **0.036** |
| **Total industrial exhaust emissions** | **0.067** | **0.119** | **0.563** | **0.573** | **0.067** | **0.033** |
| **Average temperature** | **-0.786** | **0.147** | **-5.345** | **0** | **-0.786** | **-0.254** |
| **Precipitation** | **-3.963** | **1.263** | **-3.138** | **0.002** | **-3.963** | **-0.165** |
| **Wind speed** | **-0.052** | **0.066** | **-0.788** | **0.43** | **-0.052** | **-0.025** |
| **Control area of underground pests** | **0.484** | **0.025** | **19.587** | **0** | **0.484** | **0.786** |
| **Crop simplification** | **0.187** | **0.09** | **2.077** | **0.038** | **0.187** | **0.108** |
| **Aging population** | **-0.154** | **0.379** | **-0.406** | **0.685** | **-0.154** | **-0.018** |
| **Irrigation** | **-0.799** | **0.181** | **-4.4** | **0** | **-0.799** | **-0.48** |
| **Fertilizer** | **0.285** | **0.181** | **1.579** | **0.114** | **0.285** | **0.191** |

Table S6 All direct and indirect effects of climate change, crop simplification, agricultural activities and economic development on percentage of occurrence area of wheat rust.

| **Regressions** | **Estimate** | **Std.Err** | **z-value** | **P(>|z|)** | **Std.lv** | **Std.all** |
| --- | --- | --- | --- | --- | --- | --- |
| **Average temperature ~** | | |  |  |  |  |
| **GDP** | **-0.022** | **0.271** | **-0.083** | **0.934** | **-0.022** | **-0.043** |
| **Total industrial exhaust emissions** | **0.183** | **0.276** | **0.665** | **0.506** | **0.183** | **0.281** |
| **Precipitation ~** | |  |  |  |  |  |
| **GDP** | **-0.251** | **0.267** | **-0.939** | **0.348** | **-0.251** | **-3.709** |
| **Total industrial exhaust emissions** | **0.043** | **0.182** | **0.234** | **0.815** | **0.043** | **0.506** |
| **Crop simplification** | **0.511** | **0.336** | **1.52** | **0.129** | **0.511** | **7.117** |
| **Fertilizer** | **-0.066** | **0.102** | **-0.65** | **0.515** | **-0.066** | **-1.068** |
| **Wind speed ~** | |  |  |  |  |  |
| **GDP** | **0.287** | **0.174** | **1.649** | **0.099** | **0.287** | **0.368** |
| **Total industrial exhaust emissions** | **-0.238** | **0.189** | **-1.26** | **0.208** | **-0.238** | **-0.244** |
| **Control area of wheat rust ~** | | |  |  |  |  |
| **GDP** | **3.313** | **4.756** | **0.697** | **0.486** | **3.313** | **1.173** |
| **Total industrial exhaust emissions** | **-0.679** | **3.323** | **-0.204** | **0.838** | **-0.679** | **-0.193** |
| **Aging population** | **-18.221** | **15.59** | **-1.169** | **0.243** | **-18.221** | **-1.239** |
| **Crop simplification** | **-2.296** | **2.714** | **-0.846** | **0.397** | **-2.296** | **-0.766** |
| **Average temperature** | **2.712** | **1.069** | **2.537** | **0.011** | **2.712** | **0.504** |
| **Crop simplification ~** | | |  |  |  |  |
| **GDP** | **-0.199** | **0.559** | **-0.356** | **0.722** | **-0.199** | **-0.211** |
| **Total industrial exhaust emissions** | **0.087** | **0.312** | **0.28** | **0.779** | **0.087** | **0.074** |
| **Fertilizer** | **0.46** | **0.263** | **1.749** | **0.08** | **0.46** | **0.531** |
| **Aging population** | **3.616** | **1.52** | **2.379** | **0.017** | **3.616** | **0.737** |
| **Fertilizer ~** | |  |  |  |  |  |
| **Average temperature** | **0.359** | **0.16** | **2.247** | **0.025** | **0.359** | **0.173** |
| **Precipitation** | **4.308** | **1.028** | **4.192** | **0** | **4.308** | **0.268** |
| **Effective irrigation area** | **0.953** | **0.083** | **11.508** | **0** | **0.953** | **0.853** |
| **Aging population** | **-0.421** | **0.708** | **-0.595** | **0.552** | **-0.421** | **-0.074** |
| **GDP** | **-0.466** | **0.177** | **-2.631** | **0.009** | **-0.466** | **-0.428** |
| **Total industrial exhaust emissions** | **0.532** | **0.133** | **4.004** | **0** | **0.532** | **0.392** |
| **Effective irrigation area ~** | | |  |  |  |  |
| **Fertilizer** | **0.73** | **0.109** | **6.683** | **0** | **0.73** | **0.815** |
| **Total industrial exhaust emissions** | **0.516** | **0.165** | **3.134** | **0.002** | **0.516** | **0.425** |
| **GDP** | **-0.33** | **0.211** | **-1.566** | **0.117** | **-0.33** | **-0.339** |
| **Aging population** | **-0.032** | **0.633** | **-0.05** | **0.96** | **-0.032** | **-0.006** |
| **Crop simplification** | **-0.163** | **0.062** | **-2.651** | **0.008** | **-0.163** | **-0.158** |
| **Aging populationng** | |  |  |  |  |  |
| **Average temperature** | **6.851** | **19.616** | **0.349** | **0.727** | **6.851** | **18.706** |
| **Precipitation** | **-80.823** | **236.218** | **-0.342** | **0.732** | **-80.823** | **-28.483** |
| **GDP** | **0.532** | **1.358** | **0.392** | **0.695** | **0.532** | **2.771** |
| **Effective irrigation area** | **-0.134** | **0.428** | **-0.313** | **0.754** | **-0.134** | **-0.679** |
| **GDP ~** |  |  |  |  |  |  |
| **Aging population** | **-2.35** | **6.089** | **-0.386** | **0.7** | **-2.35** | **-0.451** |
| **Effective irrigation area** | **-0.786** | **2.16** | **-0.364** | **0.716** | **-0.786** | **-0.766** |
| **Fertilizer** | **2.093** | **2.34** | **0.895** | **0.371** | **2.093** | **2.278** |
| **Percentage of occurrence area of wheat rust~** | | | | |  |  |
| **GDP** | **-0.453** | **0.104** | **-4.335** | **0** | **-0.453** | **-0.309** |
| **Total industrial exhaust emissions** | **0.23** | **0.113** | **2.036** | **0.042** | **0.23** | **0.126** |
| **Average temperature** | **0.033** | **0.14** | **0.238** | **0.812** | **0.033** | **0.012** |
| **Precipitation** | **-0.129** | **1.145** | **-0.113** | **0.91** | **-0.129** | **-0.006** |
| **Wind speed** | **-0.009** | **0.064** | **-0.144** | **0.885** | **-0.009** | **-0.005** |
| **Control area of wheat rust** | **0.406** | **0.02** | **20.175** | **0** | **0.406** | **0.785** |
| **Crop simplification** | **-0.565** | **0.082** | **-6.929** | **0** | **-0.565** | **-0.364** |
| **Aging population** | **0.711** | **0.364** | **1.955** | **0.051** | **0.711** | **0.093** |
| **Effective irrigation area** | **-1.43** | **0.174** | **-8.204** | **0** | **-1.43** | **-0.953** |
| **Fertilizer** | **1.285** | **0.175** | **7.328** | **0** | **1.285** | **0.956** |

Table S7 All direct and indirect effects of climate change, crop simplification, agricultural activities and economic development on percentage of occurrence area of wheat scab.

| **Regressions** | **Estimate** | **Std.Err** | **z-value** | **P(>|z|)** | **Std.lv** | **Std.all** |
| --- | --- | --- | --- | --- | --- | --- |
| **Average temperature ~** | | |  |  |  |  |
| **GDP** | **-0.012** | **0.264** | **-0.047** | **0.963** | **-0.012** | **-0.023** |
| **Total industrial exhaust emissions** | **0.173** | **0.269** | **0.643** | **0.52** | **0.173** | **0.265** |
| **Precipitation ~** | |  |  |  |  |  |
| **GDP** | **-0.296** | **0.262** | **-1.126** | **0.26** | **-0.296** | **-4.367** |
| **Total industrial exhaust emissions** | **0.046** | **0.178** | **0.261** | **0.794** | **0.046** | **0.549** |
| **Crop simplification** | **0.475** | **0.278** | **1.707** | **0.088** | **0.475** | **6.618** |
| **Fertilizer** | **0.007** | **0.249** | **0.029** | **0.977** | **0.007** | **0.114** |
| **Wind spped ~** | |  |  |  |  |  |
| **GDP** | **0.285** | **0.17** | **1.682** | **0.093** | **0.285** | **0.365** |
| **Total industrial exhaust emissions** | **-0.236** | **0.184** | **-1.278** | **0.201** | **-0.236** | **-0.242** |
| **Control area of wheat scab ~** | | |  |  |  |  |
| **GDP** | **3.302** | **3.088** | **1.069** | **0.285** | **3.302** | **1.171** |
| **Total industrial exhaust emissions** | **-0.632** | **2.218** | **-0.285** | **0.776** | **-0.632** | **-0.18** |
| **Aging population** | **-2.092** | **20.964** | **-0.1** | **0.921** | **-2.092** | **-0.143** |
| **Crop simplification** | **-2.388** | **3.001** | **-0.796** | **0.426** | **-2.388** | **-0.799** |
| **Average temperature** | **1.648** | **1.036** | **1.59** | **0.112** | **1.648** | **0.307** |
| **Crop simplification ~** | | |  |  |  |  |
| **GDP** | **-0.602** | **0.744** | **-0.81** | **0.418** | **-0.602** | **-0.639** |
| **Total industrial exhaust emissions** | **0.127** | **0.366** | **0.348** | **0.728** | **0.127** | **0.108** |
| **Fertilizer** | **0.818** | **0.989** | **0.827** | **0.408** | **0.818** | **0.944** |
| **Aging population** | **4.475** | **0.896** | **4.992** | **0** | **4.475** | **0.912** |
| **Fertilizer ~** | |  |  |  |  |  |
| **Average temperature** | **0.368** | **0.157** | **2.337** | **0.019** | **0.368** | **0.177** |
| **Precipitation** | **4.415** | **0.929** | **4.755** | **0** | **4.415** | **0.275** |
| **Irrigation** | **0.959** | **0.093** | **10.264** | **0** | **0.959** | **0.859** |
| **Aging population** | **-0.645** | **0.699** | **-0.922** | **0.356** | **-0.645** | **-0.114** |
| **GDP** | **-0.448** | **0.187** | **-2.401** | **0.016** | **-0.448** | **-0.412** |
| **Total industrial exhaust emissions** | **0.524** | **0.132** | **3.981** | **0** | **0.524** | **0.387** |
| **Irrigation ~** | |  |  |  |  |  |
| **Fertilizer** | **0.693** | **0.106** | **6.547** | **0** | **0.693** | **0.774** |
| **Total industrial exhaust emissions** | **0.589** | **0.29** | **2.034** | **0.042** | **0.589** | **0.485** |
| **GDP** | **-0.398** | **0.427** | **-0.93** | **0.352** | **-0.398** | **-0.408** |
| **Aging population** | **0.453** | **1.97** | **0.23** | **0.818** | **0.453** | **0.089** |
| **Crop simplification** | **-0.186** | **0.111** | **-1.674** | **0.094** | **-0.186** | **-0.18** |
| **Aging populationng** | |  |  |  |  |  |
| **Average temperature** | **16.222** | **108.733** | **0.149** | **0.881** | **16.222** | **44.29** |
| **Precipitation** | **-193.802** | **1307.582** | **-0.148** | **0.882** | **-193.802** | **-68.284** |
| **GDP** | **1.182** | **7.231** | **0.163** | **0.87** | **1.182** | **6.153** |
| **Irrigation** | **-0.278** | **1.597** | **-0.174** | **0.862** | **-0.278** | **-1.411** |
| **GDP ~** |  |  |  |  |  |  |
| **Aging population** | **-46.03** | **793.174** | **-0.058** | **0.954** | **-46.03** | **-8.844** |
| **Irrigation** | **-12.76** | **218.178** | **-0.058** | **0.953** | **-12.76** | **-12.441** |
| **Fertilizer** | **16.299** | **258.563** | **0.063** | **0.95** | **16.299** | **17.742** |
| **Percentage of occurrence area of wheat scab ~** | | | | |  |  |
| **GDP** | **0.134** | **0.096** | **1.396** | **0.163** | **0.134** | **0.079** |
| **Total industrial exhaust emissions** | **0.023** | **0.107** | **0.216** | **0.829** | **0.023** | **0.011** |
| **Average temperature** | **-0.04** | **0.133** | **-0.298** | **0.766** | **-0.04** | **-0.012** |
| **Precipitation** | **6.465** | **1.073** | **6.025** | **0** | **6.465** | **0.259** |
| **Wind spped** | **0.037** | **0.061** | **0.601** | **0.548** | **0.037** | **0.017** |
| **Control area of wheat scab** | **0.581** | **0.02** | **28.632** | **0** | **0.581** | **0.971** |
| **Crop simplification** | **-0.171** | **0.08** | **-2.136** | **0.033** | **-0.171** | **-0.096** |
| **Aging population** | **1.027** | **0.355** | **2.891** | **0.004** | **1.027** | **0.117** |
| **Irrigation** | **0.062** | **0.166** | **0.374** | **0.708** | **0.062** | **0.036** |
| **Fertilizer** | **-0.642** | **0.166** | **-3.858** | **0** | **-0.642** | **-0.414** |

Table S8 All direct and indirect effects of climate change, crop simplification, agricultural activities and economic development on percentage of occurrence area of wheat powdery mildew.

| **Regressions** | **Estimate** | **Std.Err** | **z-value** | **P(>|z|)** | **Std.lv** | **Std.all** |
| --- | --- | --- | --- | --- | --- | --- |
| **Average temperature ~** | |  |  |  |  |  |
| **GDP** | **-0.038** | **0.281** | **-0.134** | **0.893** | **-0.038** | **-0.072** |
| **Total industrial exhaust emissions** | **0.199** | **0.286** | **0.695** | **0.487** | **0.199** | **0.305** |
| **Precipitation ~** |  |  |  |  |  |  |
| **GDP** | **-0.166** | **0.224** | **-0.741** | **0.459** | **-0.166** | **-2.451** |
| **Total industrial exhaust emissions** | **0.022** | **0.147** | **0.152** | **0.879** | **0.022** | **0.265** |
| **Crop simplification** | **0.419** | **0.289** | **1.451** | **0.147** | **0.419** | **5.829** |
| **Fertilizer** | **-0.083** | **0.084** | **-0.999** | **0.318** | **-0.083** | **-1.342** |
| **Wind speed ~** |  |  |  |  |  |  |
| **GDP** | **0.288** | **0.178** | **1.619** | **0.105** | **0.288** | **0.369** |
| **Total industrial exhaust emissions** | **-0.239** | **0.192** | **-1.241** | **0.215** | **-0.239** | **-0.245** |
| **Control area of wheat powdery mildew ~** | | | |  |  |  |
| **GDP** | **3.3** | **7.153** | **0.461** | **0.645** | **3.3** | **1.152** |
| **Total industrial exhaust emissions** | **-0.592** | **4.944** | **-0.12** | **0.905** | **-0.592** | **-0.166** |
| **Aging population** | **-24.542** | **18.66** | **-1.315** | **0.188** | **-24.542** | **-1.645** |
| **Crop simplification** | **-0.564** | **2.618** | **-0.216** | **0.829** | **-0.564** | **-0.186** |
| **Average temperature** | **3.007** | **0.949** | **3.17** | **0.002** | **3.007** | **0.55** |
| **Crop simplification ~** | |  |  |  |  |  |
| **GDP** | **-0.025** | **0.459** | **-0.054** | **0.957** | **-0.025** | **-0.027** |
| **Total industrial exhaust emissions** | **0.058** | **0.331** | **0.175** | **0.861** | **0.058** | **0.049** |
| **Fertilizer** | **0.339** | **0.105** | **3.23** | **0.001** | **0.339** | **0.392** |
| **Aging population** | **3.04** | **1.273** | **2.388** | **0.017** | **3.04** | **0.62** |
| **Fertilizer ~** |  |  |  |  |  |  |
| **Average temperature** | **0.352** | **0.161** | **2.189** | **0.029** | **0.352** | **0.169** |
| **Precipitation** | **4.219** | **1.335** | **3.161** | **0.002** | **4.219** | **0.262** |
| **Irrigation** | **0.937** | **0.066** | **14.163** | **0** | **0.937** | **0.839** |
| **Aging population** | **-0.301** | **0.885** | **-0.34** | **0.734** | **-0.301** | **-0.053** |
| **GDP** | **-0.458** | **0.163** | **-2.81** | **0.005** | **-0.458** | **-0.42** |
| **Total industrial exhaust emissions** | **0.528** | **0.148** | **3.568** | **0** | **0.528** | **0.39** |
| **Irrigation ~** |  |  |  |  |  |  |
| **Fertilizer** | **0.787** | **0.101** | **7.825** | **0** | **0.787** | **0.878** |
| **Total industrial exhaust emissions** | **0.504** | **0.23** | **2.196** | **0.028** | **0.504** | **0.416** |
| **GDP** | **-0.368** | **0.312** | **-1.181** | **0.238** | **-0.368** | **-0.378** |
| **Aging population** | **-0.024** | **0.868** | **-0.028** | **0.978** | **-0.024** | **-0.005** |
| **Crop simplification** | **-0.159** | **0.075** | **-2.119** | **0.034** | **-0.159** | **-0.154** |
| **Aging populationng** | |  |  |  |  |  |
| **Average temperature** | **2.426** | **2.568** | **0.945** | **0.345** | **2.426** | **6.624** |
| **Precipitation** | **-27.673** | **30.779** | **-0.899** | **0.369** | **-27.673** | **-9.754** |
| **GDP** | **0.227** | **0.242** | **0.939** | **0.348** | **0.227** | **1.183** |
| **Irrigation** | **-0.055** | **0.139** | **-0.391** | **0.695** | **-0.055** | **-0.277** |
| **GDP ~** |  |  |  |  |  |  |
| **Aging population** | **0.662** | **1.87** | **0.354** | **0.723** | **0.662** | **0.127** |
| **Irrigation** | **0.004** | **1.051** | **0.004** | **0.997** | **0.004** | **0.004** |
| **Fertilizer** | **1.145** | **1.014** | **1.129** | **0.259** | **1.145** | **1.246** |
| **percentage of occurrence area of wheat powdery mildew ~** | | | | |  |  |
| **GDP** | **-0.027** | **0.048** | **-0.553** | **0.58** | **-0.027** | **-0.036** |
| **Total industrial exhaust emissions** | **0.135** | **0.053** | **2.529** | **0.011** | **0.135** | **0.145** |
| **Average temperature** | **0.042** | **0.068** | **0.614** | **0.539** | **0.042** | **0.029** |
| **Precipitation** | **-0.705** | **0.576** | **-1.223** | **0.221** | **-0.705** | **-0.064** |
| **Wind speed** | **0.025** | **0.03** | **0.814** | **0.416** | **0.025** | **0.026** |
| **Control area of wheat powdery mildew** | **0.22** | **0.01** | **22.289** | **0** | **0.22** | **0.84** |
| **Crop simplification** | **0.102** | **0.041** | **2.52** | **0.012** | **0.102** | **0.129** |
| **Aging population** | **0.46** | **0.172** | **2.668** | **0.008** | **0.46** | **0.118** |
| **Irrigation** | **-0.377** | **0.082** | **-4.576** | **0** | **-0.377** | **-0.491** |
| **Fertilizer** | **0.005** | **0.082** | **0.064** | **0.949** | **0.005** | **0.008** |

Table S9 All direct and indirect effects of climate change, crop simplification, agricultural activities, economic development and percentage of occurrence area of wheat pests and diseases on percentage of wheat yield loss.

| **Regressions** | **Estimate** | **Std.Err** | **z-value** | **P(>|z|)** | **Std.lv** | **Std.all** |
| --- | --- | --- | --- | --- | --- | --- |
| **Average temperature ~** | |  |  |  |  |  |
| **GDP** | **0.903** | **0.317** | **2.843** | **0.004** | **0.903** | **1.726** |
| **Total industrial exhaust emissions** | **-0.746** | **0.323** | **-2.312** | **0.021** | **-0.746** | **-1.147** |
| **Precipitation ~** |  |  |  |  |  |  |
| **GDP** | **-0.015** | **0.04** | **-0.389** | **0.697** | **-0.015** | **-0.229** |
| **Total industrial exhaust emissions** | **0.013** | **0.035** | **0.359** | **0.72** | **0.013** | **0.149** |
| **Crop simplification** | **0.038** | **0.031** | **1.213** | **0.225** | **0.038** | **0.532** |
| **Wind speed ~** |  |  |  |  |  |  |
| **GDP** | **-0.271** | **0.215** | **-1.26** | **0.208** | **-0.271** | **-0.346** |
| **Total industrial exhaust emissions** | **0.323** | **0.227** | **1.424** | **0.154** | **0.323** | **0.332** |
| **Total control area of pests and diseases~** | | | |  |  |  |
| **GDP** | **6.126** | **5.643** | **1.086** | **0.278** | **6.126** | **1.913** |
| **Total industrial exhaust emissions** | **-4.996** | **5.653** | **-0.884** | **0.377** | **-4.996** | **-1.253** |
| **Aging population** | **-3.484** | **7.997** | **-0.436** | **0.663** | **-3.484** | **-0.209** |
| **Crop simplification** | **-3.097** | **2.865** | **-1.081** | **0.28** | **-3.097** | **-0.911** |
| **Average temperature** | **11.245** | **5.11** | **2.201** | **0.028** | **11.245** | **1.836** |
| **Crop simplification ~** | |  |  |  |  |  |
| **GDP** | **0.221** | **0.3** | **0.737** | **0.461** | **0.221** | **0.235** |
| **Total industrial exhaust emissions** | **-0.198** | **0.329** | **-0.6** | **0.548** | **-0.198** | **-0.169** |
| **Fertilizer** | **0.149** | **0.069** | **2.157** | **0.031** | **0.149** | **0.505** |
| **Aging population** | **2.222** | **0.486** | **4.575** | **0** | **2.222** | **0.453** |
| **Fertilizer ~** |  |  |  |  |  |  |
| **Average temperature** | **-0.675** | **1.621** | **-0.416** | **0.677** | **-0.675** | **-0.111** |
| **Precipitation** | **5.893** | **13.244** | **0.445** | **0.656** | **5.893** | **0.125** |
| **Irrigation** | **2** | **3.454** | **0.579** | **0.563** | **2** | **0.612** |
| **Aging population** | **0.278** | **6.07** | **0.046** | **0.964** | **0.278** | **0.017** |
| **GDP** | **-0.115** | **0.565** | **-0.203** | **0.839** | **-0.115** | **-0.036** |
| **Total industrial exhaust emissions** | **1.074** | **2.829** | **0.38** | **0.704** | **1.074** | **0.27** |
| **Irrigation ~** |  |  |  |  |  |  |
| **Fertilizer** | **0.074** | **0.392** | **0.19** | **0.85** | **0.074** | **0.243** |
| **Total industrial exhaust emissions** | **0.595** | **1.04** | **0.573** | **0.567** | **0.595** | **0.49** |
| **GDP** | **0.124** | **0.198** | **0.627** | **0.531** | **0.124** | **0.127** |
| **Aging population** | **-1.195** | **0.797** | **-1.498** | **0.134** | **-1.195** | **-0.235** |
| **Crop simplification** | **-0.189** | **0.371** | **-0.511** | **0.61** | **-0.189** | **-0.183** |
| **Aging population** | | | | |  |  |
| **Average temperature** | **-0.008** | **0.064** | **-0.117** | **0.907** | **-0.008** | **-0.021** |
| **Precipitation** | **0.528** | **0.605** | **0.873** | **0.383** | **0.528** | **0.186** |
| **GDP** | **0.07** | **0.016** | **4.414** | **0** | **0.07** | **0.362** |
| **GDP ~** |  |  |  |  |  |  |
| **Aging population** | **-2.482** | **2.105** | **-1.179** | **0.238** | **-2.482** | **-0.477** |
| **Fertilizer** | **0.519** | **0.142** | **3.652** | **0** | **0.519** | **1.654** |
| **Percentage of occurrence area of pests and diseases** | **2.835** | **1.103** | **2.571** | **0.01** | **2.835** | **5.001** |
| **TCA** | **-1.827** | **0.659** | **-2.772** | **0.006** | **-1.827** | **-5.851** |
| **Irrigation** | **1.172** | **0.575** | **2.037** | **0.042** | **1.172** | **1.143** |
| **Percentage of occurrence area of pests and diseases ~** | | | | |  |  |
| **GDP** | **-1.474** | **0.388** | **-3.8** | **0** | **-1.474** | **-0.836** |
| **Total industrial exhaust emissions** | **1.483** | **0.369** | **4.018** | **0** | **1.483** | **0.675** |
| **Average temperature** | **-0.617** | **0.439** | **-1.404** | **0.16** | **-0.617** | **-0.183** |
| **Precipitation** | **-6.676** | **3.645** | **-1.831** | **0.067** | **-6.676** | **-0.256** |
| **Wind speed** | **-0.229** | **0.127** | **-1.804** | **0.071** | **-0.229** | **-0.102** |
| **TCA** | **0.06** | **0.101** | **0.591** | **0.554** | **0.06** | **0.109** |
| **Crop simplification** | **0.065** | **0.206** | **0.314** | **0.753** | **0.065** | **0.035** |
| **Aging population** | **4.398** | **1.003** | **4.384** | **0** | **4.398** | **0.479** |
| **Irrigation** | **-1.149** | **0.214** | **-5.357** | **0** | **-1.149** | **-0.635** |
| **Fertilizer** | **0.39** | **0.118** | **3.296** | **0.001** | **0.39** | **0.705** |
| **Percentage of wheat yield loss ~** | | |  |  |  |  |
| **Percentage of occurrence area of pests and diseases** | **0.365** | **0.043** | **8.544** | **0** | **0.365** | **0.578** |
| **GDP** | **-0.117** | **0.068** | **-1.717** | **0.086** | **-0.117** | **-0.105** |
| **Total industrial exhaust emissions** | **0.035** | **0.074** | **0.479** | **0.632** | **0.035** | **0.026** |
| **Average temperature** | **0.21** | **0.087** | **2.415** | **0.016** | **0.21** | **0.098** |
| **Precipitation** | **1.138** | **0.713** | **1.596** | **0.11** | **1.138** | **0.069** |
| **Wind speed** | **-0.005** | **0.04** | **-0.124** | **0.902** | **-0.005** | **-0.003** |
| **Total control area of pests and diseases~** | **0.13** | **0.023** | **5.577** | **0** | **0.13** | **0.375** |
| **Crop simplification** | **0.035** | **0.054** | **0.649** | **0.517** | **0.035** | **0.029** |
| **Aging population** | **0.061** | **0.247** | **0.247** | **0.805** | **0.061** | **0.011** |
| **Irrigation** | **-0.184** | **0.062** | **-2.983** | **0.003** | **-0.184** | **-0.161** |
| **Fertilizer** | **0.02** | **0.021** | **0.946** | **0.344** | **0.02** | **0.057** |
